# Supplementary material for: Unveiled feather microcosm: feather microbiota of passerine birds is closely associated with host species identity and bacteriocin-producing bacteria
Source: PubMed Central journal article supplement (PMC6775979; doi:10.1038/s41396-019-0438-4), 2019-05-24

**Figure S1.** Map illustrating the locality of sampling sites. Different letters and colours denote particular sampling sites.

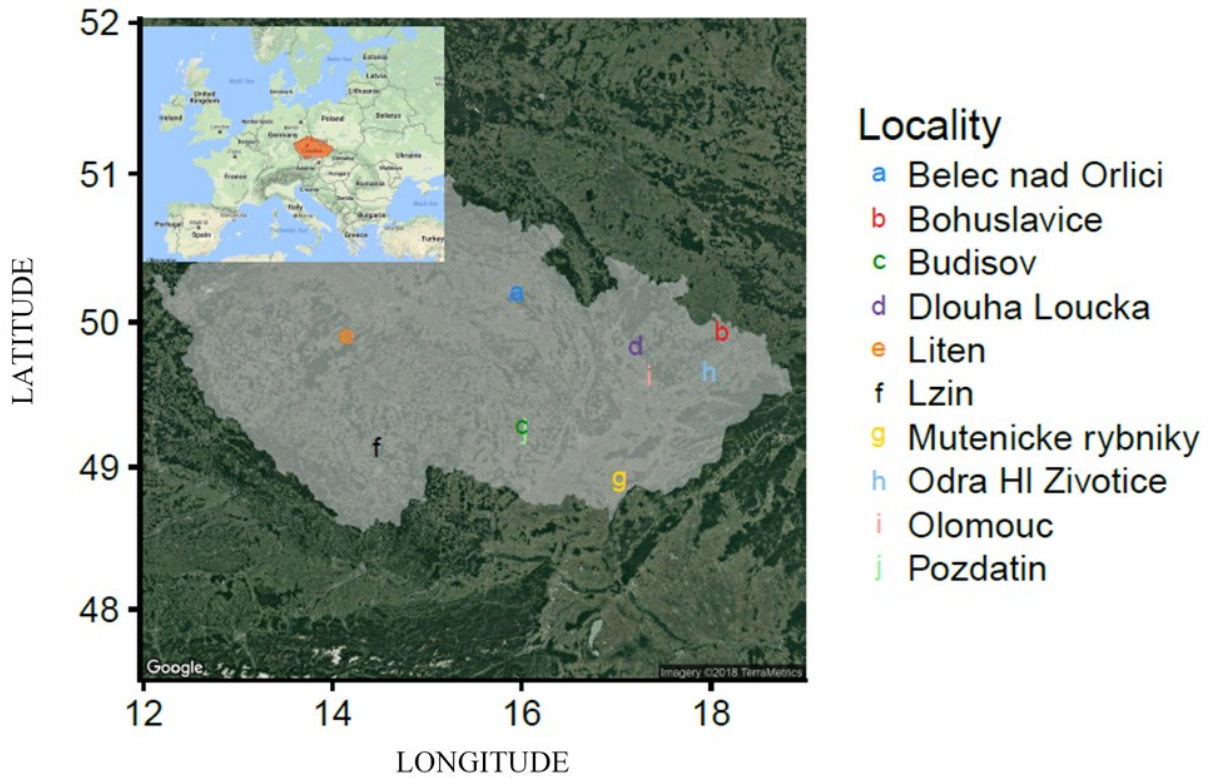

Supplement: 41396_2019_438_MOESM6_ESM.pdf [file 41396_2019_438_MOESM6_ESM.pdf]
